# Supplementary material for: The Mechanism of Wear Reduction in the Ni-CaF2 Composite Material: Raman and Confocal Microscopy Insights
Source: MDPI journal article supplement (doi:10.3390/ma15165501), 2022-08-10
Supplement: s1 [file s1]

## Supplementary material for

### The mechanism of wear reduction in the Ni-CaF<sub>2</sub> composite material: Raman and confocal microscopy insights

Mateusz Kotkowiak<sup>a\*</sup>, Adam Piasecki<sup>a</sup>, Michał Kotkowiak<sup>b</sup>, Tomasz Buchwald<sup>c</sup>

<sup>a</sup> Institute of Materials Science and Engineering, Poznan University of Technology, Pl. M. Skłodowskiej-Curie 5, 60-965 Poznan, Poland

<sup>b</sup> Institute of Physics, Poznan University of Technology, Piotrowo 3, 60-965 Poznan, Poland

<sup>c</sup> Institute of Materials Research and Quantum Engineering, Poznan University of Technology, Piotrowo 3, 60965 Poznan, Poland

\*corresponding author mateusz.kotkowiak@put.poznan.pl (Mateusz Kotkowiak)

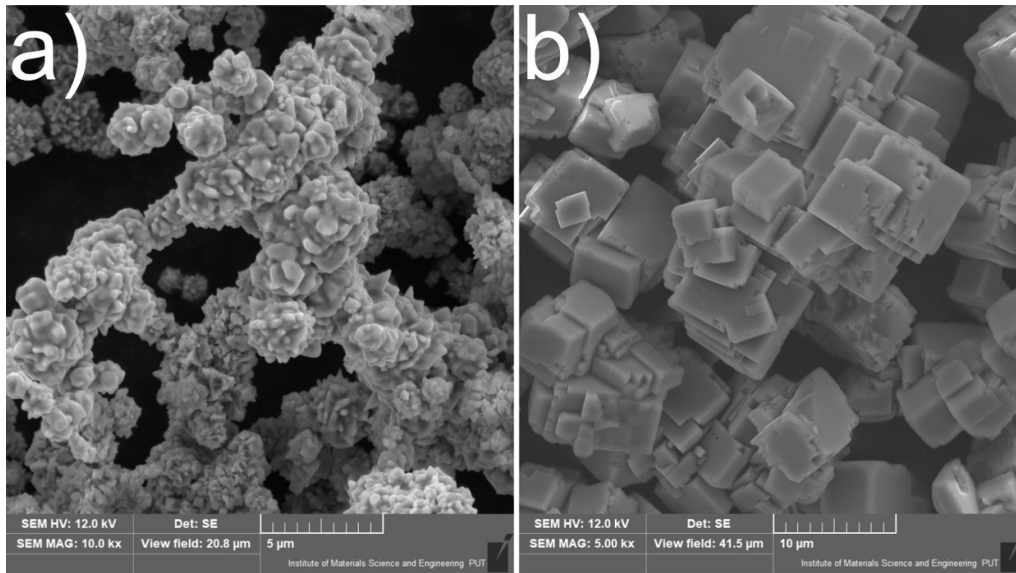

Figure S1. The powders used in this investigation: pure Ni (a) and CaF<sub>2</sub> (b).

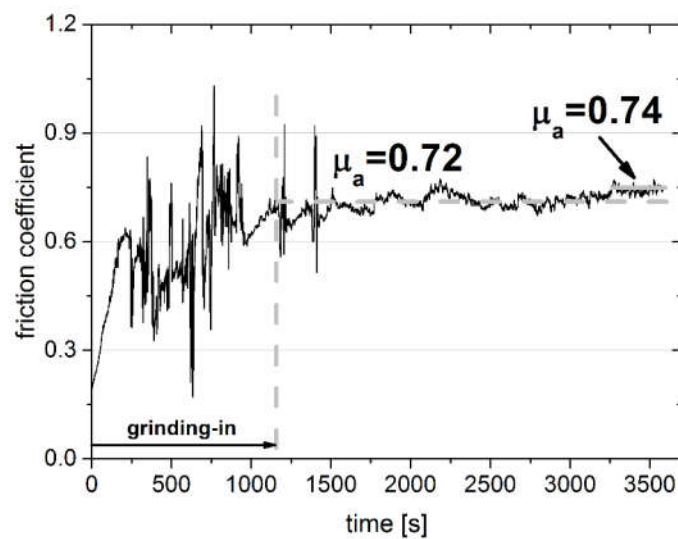

Figure S2. Friction coefficient vs. time of friction for sintered Ni-10%CaF<sub>2</sub> self-lubricating composite, mating with Inconel<sup>®</sup>625-alloy at room temperature.

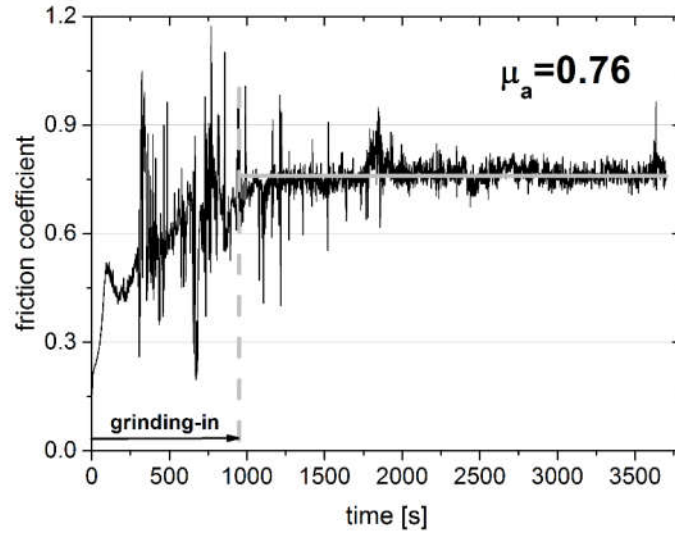

**Figure S3.** Friction coefficient vs. time of friction for sintered Ni-10%CaF<sub>2</sub> self-lubricating composite, mating with Inconel®625-alloy at 200°C (473 K).

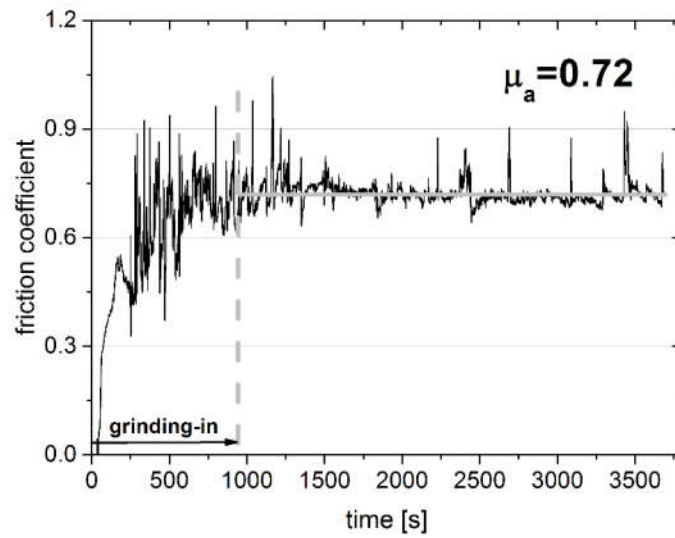

**Figure S4.** Friction coefficient vs. time of friction for sintered Ni-10%CaF<sub>2</sub> self-lubricating composite, mating with Inconel®625-alloy at 400°C (673 K).

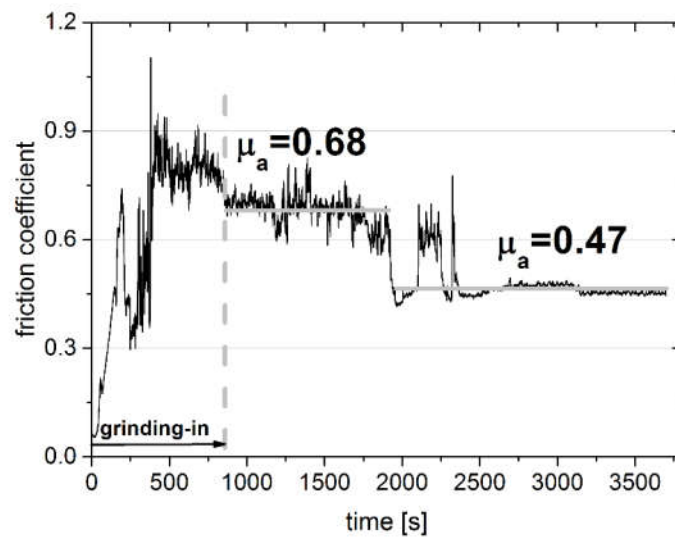

**Figure S5.** Friction coefficient vs. time of friction for sintered Ni-10%CaF<sub>2</sub> self-lubricating composite, mating with Inconel®625-alloy at 600°C (873 K).
